# Supplementary material for: Different Visual Preference Patterns in Response to Simple and Complex Dynamic Social Stimuli in Preschool-Aged Children with Autism Spectrum Disorders
Source: PLoS One. 2015 Mar 17;10(3):e0122280. doi: 10.1371/journal.pone.0122280 (PMC4363528; doi:10.1371/journal.pone.0122280)
Supplement: S1 Dataset — P_: Part I; S_: Part II. (XLS) [file pone.0122280.s001.xls]

## Sheet: data
subject	group	gender	age,month	PPVT VIQ	P_duration on DGIs	P_duration on DSIs	P_total duration	P_number on DGIs	P_number on DSIs	P_total fixationduration	P_DSIs fixationduration	P_DGIs fixationduration	P_percentageof fixationduration DSIs	P_percentage of fixationduration DGIs	P_gazeduration to DGIs	P_gazeduration to DSIs	P_time of first fixation to DSIs	P_time of first fixation to DGIs	ADIA	ADIB	ADIC	ADID	ADOSA	ADOSB	ADOSD	ADOSAB	ADOStotalscore	S_duration on DSIs	S_duration on DGIs	S_total duration	S_percentage of fixationduration on DSIs	S_percentage of fixationduration on DGIs	S_number on DSIs	S_number on DGIs	S_total fixationduration	S_fixationduration on DSIs	S_fixationduration on DGIs	S_gazeduration to DGIs	S_gazeduration to DSIs	S_time of first fixation to DSIs	S_time of first fixation to DGIs
t014	TDC	Male	38	134	46042	3622	49664	46	9	82.7733	6.03667	76.7367	7.29301	92.707	514	744	744	38										5582	42958	48540	11.4998	88.5002	11	36	80.9	9.30333	71.5967	2554	1094	1094	234
t016	TDC	Male	39	80	26964	19324	46288	31	32	77.1467	32.2067	44.94	41.7473	58.2527	204	940	402	204										31386	19500	50886	61.679	38.321	44	28	84.81	52.31	32.5	446	1780	212	446
t015	TDC	Male	45	110	20160	26840	47000	32	42	78.3333	44.7333	33.6	57.1064	42.8936	358	1316	1316	358										34728	12138	46866	74.1006	25.8994	61	23	78.11	57.88	20.23	394	1030	400	394
t024	TDC	Male	46	116	23392	23700	47092	29	39	78.4867	39.5	38.9867	50.327	49.673	498	476	476	300										42976	5706	48682	88.279	11.721	62	12	81.1367	71.6267	9.51	464	5370	1250	464
t010	TDC	Male	47	123	3030	44796	47826	9	66	79.71	74.66	5.05	93.6645	6.33547	428	494	84	240										36134	9554	45688	79.0886	20.9114	46	19	76.1467	60.2233	15.9233	202	2188	200	202
t022	TDC	Female	50	97	11762	37976	49738	20	40	82.8967	63.2933	19.6033	76.3521	23.6479	692	1110	436	692										46280	4284	50564	91.5276	8.47243	67	9	84.2733	77.1333	7.14	260	1776	198	260
t009	TDC	Male	51	102	22582	23560	46142	48	46	76.9033	39.2667	37.6367	51.0598	48.9402	864	870	562	536										28026	19538	47564	58.9227	41.0773	63	34	79.2733	46.71	32.5633	446	752	182	446
t017	TDC	Male	51	104	17528	25640	43168	25	39	71.9467	42.7333	29.2133	59.3958	40.6042	1748	1376	472	306										33308	14762	48070	69.2906	30.7094	44	12	80.1167	55.5133	24.6033	942	558	558	942
t012	TDC	Female	51	119	27728	18068	45796	31	34	76.3267	30.1133	46.2133	39.4532	60.5468	720	2292	1218	720										25546	22002	47548	53.7268	46.2732	34	20	79.2467	42.5767	36.67	658	588	588	658
t011	TDC	Female	52	118	31044	15500	46544	30	24	77.5733	25.8333	51.74	33.3018	66.6982	1050	1200	1200	650										17278	30906	48184	35.8584	64.1416	22	27	80.3067	28.7967	51.51	210	278	278	210
t004	TDC	Male	59	139	3534	31938	35472	16	70	59.12	53.23	5.89	90.0372	9.96279	212	28	28	212										37218	12102	49320	75.4623	24.5377	64	17	82.2	62.03	20.17	400	22	22	400
t007	TDC	Male	60	100	14208	32286	46494	21	43	77.49	53.81	23.68	69.4412	30.5588	406	2916	336	406										40758	6704	47462	85.875	14.125	54	19	79.1033	67.93	11.1733	386	234	234	386
t001	TDC	Male	61	119	17058	30024	47082	36	54	78.47	50.04	28.43	63.7696	36.2304	226	902	248	226										48580	2272	50852	95.5321	4.46787	75	8	84.7533	80.9667	3.78667	282	7114	162	282
t002	TDC	Male	63	120	26290	17618	43908	45	43	73.18	29.3633	43.8167	40.1248	59.8752	1014	536	234	260										28684	20656	49340	58.1354	41.8646	43	33	82.2333	47.8067	34.4267	594	2660	1308	350
t006	TDC	Male	63	139	16024	29924	45948	36	46	76.58	49.8733	26.7067	65.1258	34.8742	444	604	170	220										30820	15404	46224	66.6753	33.3247	50	27	77.04	51.3667	25.6733	322	178	178	322
t026	TDC	Female	70	120	23586	21510	45096	30	34	75.16	35.85	39.31	47.6982	52.3018	1982	1038	518	272										42476	5214	47690	89.0669	10.9331	47	7	79.4833	70.7933	8.69	298	540	540	298
t003	TDC	Male	72	127	19962	25608	45570	58	66	75.95	42.68	33.27	56.1949	43.8051	708	928	206	208										18856	29070	47926	39.344	60.656	51	59	79.8767	31.4267	48.45	300	918	690	300
t005	TDC	Male	76	128	23496	25118	48614	31	33	81.0233	41.8633	39.16	51.6682	48.3318	40	410	410	40										33076	15912	48988	67.5186	32.4814	51	22	81.6467	55.1267	26.52	754	210	210	754
t025	TDC	Female	77	126	17084	25980	43064	28	29	71.7733	43.3	28.4733	60.3288	39.6712	416	1136	930	416										35746	10726	46472	76.9194	23.0806	50	21	77.4533	59.5767	17.8767	372	278	278	372
t027	TDC	Female	91	101	12004	36392	48396	16	28	80.66	60.6533	20.0067	75.1963	24.8037	548	424	424	548										27460	19996	47456	57.8641	42.1359	46	33	79.0933	45.7667	33.3267	314	466	466	314
a018	ASD	Male	37	70	13238	32310	45548	13	34	75.9133	53.85	22.0633	70.9362	29.0638	1246	588	588	1246	12	11	0	4	3	7	0	10	10	18822	36546	55368	33.9944	66.0056	25	32	92.28	31.37	60.91	514	2078	2078	176
a007	ASD	Male	45	61	21234	31004	52238	24	33	87.0633	51.6733	35.39	59.3514	40.6486	330	486	486	330	10	10	1	5	4	8	1	12	13	17342	32668	50010	34.6771	65.3229	29	37	83.35	28.9033	54.4467	464	2420	244	464
a001	ASD	Male	46	63	2896	44648	47544	6	45	79.24	74.4133	4.82667	93.9088	6.0912	1110	5332	336	206	18	21	3	1	5	11	4	16	20	37402	11672	49074	76.2155	23.7845	60	11	81.79	62.3367	19.4533	292	16218	160	292
a003	ASD	Female	50	56	3248	44742	47990	12	58	79.9833	74.57	5.41333	93.2319	6.76808	606	16334	4402	130	20	14	2	5	7	8	4	15	19	19476	27296	46772	41.6403	58.3597	29	60	77.9533	32.46	45.4933	384	982	370	24
a025	ASD	Male	54	66	23114	16668	39782	48	46	66.3033	27.78	38.5233	41.8983	58.1017	2534	864	208	362	23	19	4	5	5	9	3	14	17	11068	30538	41606	26.6019	73.3981	35	69	69.3433	18.4467	50.8967	368	1288	168	368
a006	ASD	Male	56	69	33582	8608	42190	19	13	70.3167	14.3467	55.97	20.4029	79.5971	354	224	224	354	24	19	7	4	7	11	4	18	22	13702	26350	40052	34.2105	65.7895	31	42	66.7533	22.8367	43.9167	650	6210	46	82
a002	ASD	Male	58	42	20438	25726	46164	30	34	76.94	42.8767	34.0633	55.7274	44.2726	632	1074	408	368	18	10	3	4	9	12	3	21	24	9804	36104	45908	21.3558	78.6442	21	40	76.5133	16.34	60.1733	250	672	672	250
a019	ASD	Male	65	48	36940	11576	48516	36	19	80.86	19.2933	61.5667	23.8602	76.1398	2038	1498	48	454	16	13	1	5	6	10	1	16	17	8080	40036	48116	16.7928	83.2072	21	41	80.1933	13.4667	66.7267	808	2772	968	808
a027	ASD	Male	66	54	29062	17666	46728	16	27	77.88	29.4433	48.4367	37.806	62.194	204	1186	444	204	23	16	2	2	6	10	1	16	17	14402	31512	45914	31.3673	68.6327	29	43	76.5233	24.0033	52.52	260	1580	1580	260
a009	ASD	Male	66	55	37258	10286	47544	16	17	79.24	17.1433	62.0967	21.6347	78.3653	962	3048	1444	506	23	21	4	5	5	9	2	14	16	30978	16712	47690	64.957	35.043	23	11	79.4833	51.63	27.8533	252	5892	2582	252
a008	ASD	Male	68	56	41208	7466	48674	27	10	81.1233	12.4433	68.68	15.3388	84.6612	3770	2488	416	1110	10	9	4	3	6	9	2	15	17	3176	45194	48370	6.56605	93.4339	10	33	80.6167	5.29333	75.3233	16062	524	86	448
a022	ASD	Male	82	49	13630	18185	31815	29	30	53.025	30.3083	22.7167	57.1586	42.8414	447	514	514	229	19	19	1	5	5	8	2	13	15	18685	22877	41562	44.9569	55.0431	40	42	69.27	31.1417	38.1283	341	981	368	341
a004	ASD	Male	98	36	28426	13134	41560	41	27	69.2667	21.89	47.3767	31.6025	68.3975	790	210	210	288	24	17	6	5	7	9	1	16	17	15276	31240	46516	32.8403	67.1597	40	43	77.5267	25.46	52.0667	1002	212	212	506
